# Supplementary material for: Metformin Prevents Nigrostriatal Dopamine Degeneration Independent of AMPK Activation in Dopamine Neurons
Source: PLoS One. 2016 Jul 28;11(7):e0159381. doi: 10.1371/journal.pone.0159381 (PMC4965122; doi:10.1371/journal.pone.0159381)
Supplement: S1 File — (XLSX) [file pone.0159381.s001.xlsx]

## Sheet: Sheet1
corticosterone
Sample	Wells	OD Values	R	Concentration	MeanConc	Dilution	CV%
WT Water Saline
JB417	A11	1.53	Error	11.681	11.681	WT	Water	Saline
JB418	B11	1.088	Error	25.226	25.226	WT	Water	Saline
JB419	C11	1.061	Error	17.037	17.037	WT	Water	Saline
JB427	C12	1.578	Error	26.743	26.743	WT	Water	Saline
JB132	E4	1.338	Error	20.073	20.073	WT	Water	Saline
JB133	F4	1.312	Error	27.331	27.331	WT	Water	Saline
JB134	G4	1.229	Error	20.378	20.378	WT	Water	Saline
JB416	H10	1.683	Error	30.127	30.127	WT	Water	Saline
WT Metformin Saline
JB426	B12	1.409	Error	24.564	24.564	WT	Metformin	Saline
JB412	D10	1.696	Error	15.822	15.822	WT	Metformin	Saline
JB140	E5	1.429	Error	25.717	25.717	WT	Metformin	Saline
JB413	E10	1.314	Error	18.567	18.567	WT	Metformin	Saline
JB429	E12	1.267	Error	26.973	26.973	WT	Metformin	Saline
JB141	F5	1.247	Error	20.183	20.183	WT	Metformin	Saline
JB398	F8	1.361	Error	27.882	27.882	WT	Metformin	Saline
JB414	F10	1.175	Error	21.429	21.429	WT	Metformin	Saline
JB430	F12	1.451	Error	30.207	30.207	WT	Metformin	Saline
JB142	G5	1.77	Error	30.366	30.366	WT	Metformin	Saline
JB399	G8	1.12	Error	31.181	31.181	WT	Metformin	Saline
JB415	G10	1.327	Error	31.33	31.33	WT	Metformin	Saline
JB431	G12	1.646	Error	32.007	32.007	WT	Metformin	Saline
JB424	H11	1.917	Error	32.834	32.834	WT	Metformin Saline	Saline
JB432	H12	1.957	Error	33.799	33.799	WT	Metformin Saline
WT Water MPTP
JB136	A5	1.409	Error	37.643	37.643	WT	Water	MPTP
JB409	A10	1.15	Error	69.302	69.302	WT	Water	MPTP
JB137	B5	1.494	Error	37.826	37.826	WT	Water	MPTP
JB410	B10	0.955	Error	83.489	83.489	WT	Water	MPTP
JB138	C5	1.329	Error	40.004	40.004	WT	Water	MPTP
JB403	C9	1.272	Error	123.472	123.472	WT	Water	MPTP
JB411	C10	1.152	Error	43.227	43.227	WT	Water	MPTP
JB139	D5	1.155	Error	44.723	44.723	WT	Water	MPTP
JB396	D8	1.434	Error	44.844	44.844	WT	Water	MPTP
JB404	D9	1.484	Error	45.852	45.852	WT	Water	MPTP
JB397	E8	1.28	Error	49.508	49.508	WT	Water	MPTP
JB406	F9	1.263	Error	49.64	49.64	WT	Water	MPTP
JB407	G9	1.483	Error	53.9	53.9	WT	Water	MPTP
JB135	H4	1.468	Error	55.169	55.169	WT	Water	MPTP
JB408	H9	1.644	Error	63.794	63.794	WT	Water	MPTP
WT Metformin MPTP
JB128	A4	1.316	Error	30.366	64.028	WT	Metformin	MPTP
JB129	B4	1.24	Error	25.226	37.782	WT	Metformin	MPTP
JB130	C4	1.528	Error	49.508	71.227	WT	Metformin	MPTP
JB382	C8	1.349	Error	32.834	39.567	WT	Metformin	MPTP
JB131	D4	1.567	Error	53.9	113.527	WT	Metformin	MPTP
JB421	E11	1.407	Error	37.643	41.65	WT	Metformin	MPTP
KO Water Saline
JB401	A9	1.255	Error	11.326	11.326	KO	Water	Saline
JB145	B6	0.992	Error	33.192	33.192	KO	Water	Saline
JB402	B9	1.13	Error	14.522	14.522	KO	Water	Saline
JB146	C6	1.31	Error	34.778	34.778	KO	Water	Saline
JB147	D6	1.387	Error	19.069	19.069	KO	Water	Saline
JB420	D11	1.149	Error	36.25	36.25	KO	Water	Saline
JB428	D12	1.676	Error	20.047	20.047	KO	Water	Saline
JB148	E6	1.353	Error	39.179	39.179	KO	Water	Saline
KO Metformin Saline
JB144	A6	1.514	Error	32.083	32.083	KO	Metformin	Saline
JB340	A7	1.339	Error	13.043	13.043	KO	Metformin	Saline
JB425	A12	1.03	Error	34.495	34.495	KO	Metformin	Saline
JB352	B8	1.246	Error	18.784	18.784	KO	Metformin	Saline
JB149	F6	1.268	Error	35.948	35.948	KO	Metformin	Saline
JB337	G6	1.454	Error	19.074	19.074	KO	Metformin	Saline
JB143	H5	1.827	Error	37.418	37.418	KO	Metformin Saline	Saline
JB338	H6	1.405	Error	24.803	24.803	KO	Metformin Saline	Saline
KO Water MPTP
JB341	B7	1.275	Error	41.868	41.868	KO	Water	MPTP
JB342	C7	1.124	Error	68.328	68.328	KO	Water	MPTP
JB343	D7	0.944	Error	44.834	44.834	KO	Water	MPTP
JB405	E9	1.13	Error	47.926	47.926	KO	Water	MPTP
JB311	H8	1.289	Error	50.739	50.739	KO	Water	MPTP
JB312	H7	1.299	Error	52.175	52.175	KO	Water	MPTP
KO Metformin MPTP
JB351	A8	1.484	Error	58.177	58.177	KO	Metformin	MPTP
JB422	F11	1.233	Error	42.644	42.644	KO	Metformin	MPTP
JB423	G11	1.462	Error	94.013	94.013	KO	Metformin	MPTP
JB308	E7	1.326	Error	67.243	67.243	KO	Metformin	MPTP
JB309	F7	1.268	Error	49.359	49.359	KO	Metformin	MPTP
JB333	G7	1.486	Error	45.625	45.625	KO	Metformin	MPTP

## Sheet: Sheet2
		11.681			24.564
		25.226			15.822
		17.037			25.717
		26.743			18.567
		20.073			26.973
		27.331			20.183
		20.378			27.882
		30.127			21.429
					30.207
					30.366
					31.181
					31.33
					32.007
					32.834
					33.799
		37.643			64.028
		69.302			37.782
		37.826			71.227
		83.489			39.567
		40.004			113.527
		123.472			41.65
		43.227
		44.723
		44.844
		45.852
		49.508
		49.64
		53.9
		55.169
		63.794

## Sheet: Sheet3
				11.326				32.083
				33.192				13.043
				14.522				34.495
				34.778				18.784
				19.069				35.948
				36.25				19.074
				20.047				37.418
				39.179				24.803
				25.654
				26.21
				27.052
				27.505
				29.947
41.868		58.177
68.328		42.644
44.834		94.013
47.926
